# Supplementary material
Source: Springer Nature journal article supplement (https://www.springermedizin.de/resource/supplementary/12950_2012_272_MOESM16_ESM.pdf/9558332)

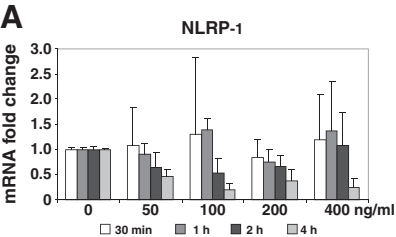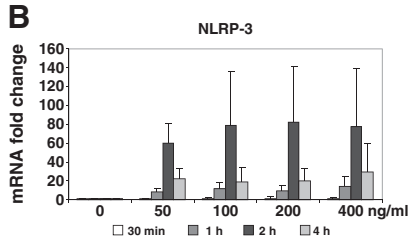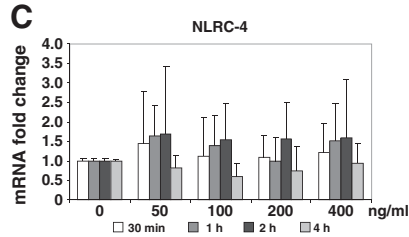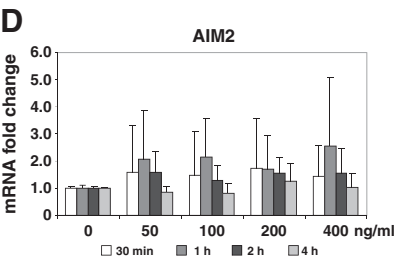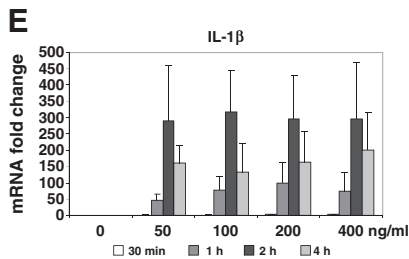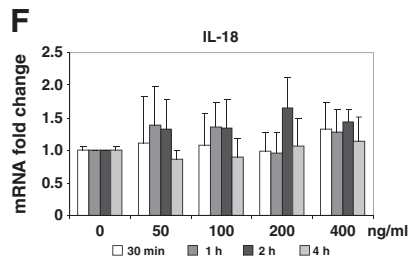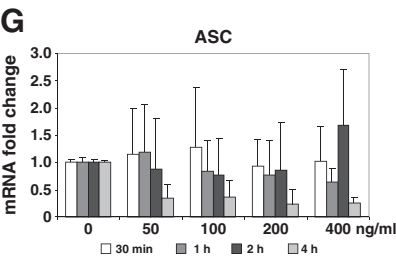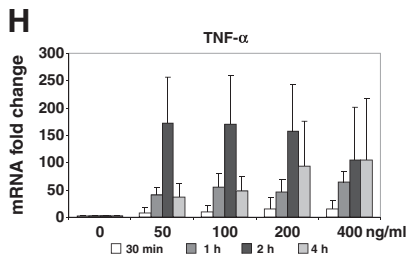

Supplement: MOESM16 [file 9558332]
